# Supplementary material for: TopHat-Recondition: a post-processor for TopHat unmapped reads
Source: PubMed Central journal article supplement (PMC4855331; doi:10.1186/s12859-016-1058-x), 2016-05-04
Supplement: 12859_2016_1058_MOESM1_ESM.pdf [file 12859_2016_1058_MOESM1_ESM.pdf]

# Supplementary Materials for TopHat-Recondition 1.0

Christian Brueffer and Lao H Saal

## Usage

TopHat-Recondition can be obtained from GitHub (<https://github.com/cbrueffer/tophat-recondition/>). Here we assume it is available as `~/tophat-recondition/tophat-recondition.py`.

The only required argument for the software is a directory containing the TopHat output files `accepted_hits.bam` and `unmapped.bam`, such as the default TopHat `tophat_out` output directory. A full list of options can be obtained by running `tophat-recondition.py` without arguments.

```
$ ~/tophat-recondition/tophat-recondition.py
Usage:

tophat-recondition.py [-hqv] [-l logfile] tophat_output_dir [result_dir]

-h          print this usage text and exit (optional)
-l          log file (optional, default: result_dir/tophat-recondition.log)
-q          quiet mode, no console output (optional)
-v          print the script name and version, and exit (optional)
tophat_output_dir: directory containing accepted_hits.bam and unmapped.bam
result_dir:   directory to write unmapped_fixup.bam to (optional, default: tophat_output_dir)
```

By default, TopHat-Recondition will write the corrected unmapped read file `unmapped_fixup.bam` to the directory containing the input BAM files.

## Example Run

To show the usage and operation of TopHat-Recondition, we use the workflow and data outlined in the TopHat tutorial:

Tutorial: <http://ccb.jhu.edu/software/tophat/tutorial.shtml>

Data: [http://ccb.jhu.edu/software/tophat/downloads/test\\_data.tar.gz](http://ccb.jhu.edu/software/tophat/downloads/test_data.tar.gz)

## Running TopHat

We extract the data and run TopHat 2.1.0 as instructed in the tutorial.

```
$ tar zxvf test_data.tar.gz
$ cd test_data
$ tophat -r 20 test_ref reads_1.fq reads_2.fq

[2015-10-30 12:58:40] Beginning TopHat run (v2.1.0)
-----
[2015-10-30 12:58:40] Checking for Bowtie
    Bowtie version: 2.2.5.0
[2015-10-30 12:58:40] Checking for Bowtie index files (genome)..
    Found both Bowtie1 and Bowtie2 indexes.
[2015-10-30 12:58:40] Checking for reference FASTA file
[2015-10-30 12:58:40] Generating SAM header for test_ref
[2015-10-30 12:58:40] Preparing reads
    left reads: min. length=75, max. length=75, 100 kept reads (0 discarded)
    right reads: min. length=75, max. length=75, 100 kept reads (0 discarded)
[2015-10-30 12:58:40] Mapping left_kept_reads to genome test_ref with Bowtie2
[2015-10-30 12:58:41] Mapping left_kept_reads_seg1 to genome test_ref with Bowtie2 (1/3)
[2015-10-30 12:58:41] Mapping left_kept_reads_seg2 to genome test_ref with Bowtie2 (2/3)
[2015-10-30 12:58:41] Mapping left_kept_reads_seg3 to genome test_ref with Bowtie2 (3/3)
[2015-10-30 12:58:41] Mapping right_kept_reads to genome test_ref with Bowtie2
[2015-10-30 12:58:41] Mapping right_kept_reads_seg1 to genome test_ref with Bowtie2 (1/3)
[2015-10-30 12:58:41] Mapping right_kept_reads_seg2 to genome test_ref with Bowtie2 (2/3)
```

```

[2015-10-30 12:58:41] Mapping right_kept_reads_seg3 to genome test_ref with Bowtie2 (3/3)
[2015-10-30 12:58:41] Searching for junctions via segment mapping
[2015-10-30 12:58:41] Retrieving sequences for splices
[2015-10-30 12:58:42] Indexing splices
Building a SMALL index
[2015-10-30 12:58:42] Mapping left_kept_reads_seg1 to genome segment_juncs with Bowtie2 (1/3)
[2015-10-30 12:58:42] Mapping left_kept_reads_seg2 to genome segment_juncs with Bowtie2 (2/3)
[2015-10-30 12:58:42] Mapping left_kept_reads_seg3 to genome segment_juncs with Bowtie2 (3/3)
[2015-10-30 12:58:42] Joining segment hits
[2015-10-30 12:58:42] Mapping right_kept_reads_seg1 to genome segment_juncs with Bowtie2 (1/3)
[2015-10-30 12:58:43] Mapping right_kept_reads_seg2 to genome segment_juncs with Bowtie2 (2/3)
[2015-10-30 12:58:43] Mapping right_kept_reads_seg3 to genome segment_juncs with Bowtie2 (3/3)
[2015-10-30 12:58:43] Joining segment hits
[2015-10-30 12:58:43] Reporting output tracks
-----
[2015-10-30 12:58:43] A summary of the alignment counts can be found in ./tophat_out/align_summary.txt
[2015-10-30 12:58:43] Run complete: 00:00:02 elapsed

```

## Running TopHat-Recondition

TopHat writes its output files — `accepted_hits.bam` and `unmapped.bam` — to the directory `tophat_out`. We run TopHat-Recondition with this directory as argument. By not specifying a separate output directory, the corrected unmapped read file — `unmapped_fixup.bam` — will be written to the input directory `tophat_out`.

```

$ tophat-recondition.py tophat_out
2015-10-30 12:59:45 - Starting run of tophat-recondition 1.0
2015-10-30 12:59:45 - Command: tophat-recondition.py tophat_out
2015-10-30 12:59:45 - Current working directory: /home/chris/test_data
2015-10-30 12:59:45 - Writing logfile: tophat_out/tophat-recondition.log
2015-10-30 12:59:45 - Opening unmapped BAM file: tophat_out/unmapped.bam
2015-10-30 12:59:45 - Loading unmapped BAM file into memory: tophat_out/unmapped.bam
2015-10-30 12:59:45 - Setting missing 0x8 flag for unmapped read-pair: test_mRNA_150_290_0
2015-10-30 12:59:45 - Setting missing 0x8 flag for unmapped read-pair: test_mRNA_96_238_3
2015-10-30 12:59:45 - Setting missing 0x8 flag for unmapped read-pair: test_mRNA_75_235_21
2015-10-30 12:59:45 - Setting missing 0x8 flag for unmapped read-pair: test_mRNA_48_207_39
2015-10-30 12:59:45 - Setting missing 0x8 flag for unmapped read-pair: test_mRNA_94_291_40
2015-10-30 12:59:45 - Setting missing 0x8 flag for unmapped read-pair: test_mRNA_33_189_4a
2015-10-30 12:59:45 - Setting missing 0x8 flag for unmapped read-pair: test_mRNA_172_294_4f
2015-10-30 12:59:45 - Setting missing 0x8 flag for unmapped read-pair: test_mRNA_4_191_5d
2015-10-30 12:59:45 - Opening mapped BAM file: tophat_out/accepted_hits.bam
2015-10-30 12:59:45 - Standardizing flags of unmapped read: test_mRNA_5_197_46
2015-10-30 12:59:45 - Standardizing flags of unmapped read: test_mRNA_11_190_1a
2015-10-30 12:59:45 - Standardizing flags of unmapped read: test_mRNA_21_208_24
2015-10-30 12:59:45 - Standardizing flags of unmapped read: test_mRNA_23_186_42
2015-10-30 12:59:45 - Standardizing flags of unmapped read: test_mRNA_28_188_11
2015-10-30 12:59:45 - Standardizing flags of unmapped read: test_mRNA_28_206_1f
2015-10-30 12:59:45 - Standardizing flags of unmapped read: test_mRNA_30_231_3c
2015-10-30 12:59:45 - Standardizing flags of unmapped read: test_mRNA_33_223_4e
2015-10-30 12:59:45 - Standardizing flags of unmapped read: test_mRNA_44_225_1e
2015-10-30 12:59:45 - Standardizing flags of unmapped read: test_mRNA_44_193_3f
2015-10-30 12:59:45 - Standardizing flags of unmapped read: test_mRNA_46_195_17
2015-10-30 12:59:45 - Standardizing flags of unmapped read: test_mRNA_51_194_49
2015-10-30 12:59:45 - Standardizing flags of unmapped read: test_mRNA_57_231_8
2015-10-30 12:59:45 - Standardizing flags of unmapped read: test_mRNA_58_234_7
2015-10-30 12:59:45 - Standardizing flags of unmapped read: test_mRNA_58_220_3d
2015-10-30 12:59:45 - Standardizing flags of unmapped read: test_mRNA_65_238_2e
2015-10-30 12:59:45 - Standardizing flags of unmapped read: test_mRNA_69_229_23
2015-10-30 12:59:45 - Standardizing flags of unmapped read: test_mRNA_81_228_3a
2015-10-30 12:59:45 - Standardizing flags of unmapped read: test_mRNA_82_255_2
2015-10-30 12:59:45 - Standardizing flags of unmapped read: test_mRNA_89_230_b
2015-10-30 12:59:45 - Standardizing flags of unmapped read: test_mRNA_89_245_15
2015-10-30 12:59:45 - Standardizing flags of unmapped read: test_mRNA_92_266_43
2015-10-30 12:59:45 - Standardizing flags of unmapped read: test_mRNA_92_250_44
2015-10-30 12:59:45 - Standardizing flags of unmapped read: test_mRNA_97_275_26
2015-10-30 12:59:45 - Standardizing flags of unmapped read: test_mRNA_114_277_5b
2015-10-30 12:59:45 - Standardizing flags of unmapped read: test_mRNA_16_194_10
2015-10-30 12:59:45 - Standardizing flags of unmapped read: test_mRNA_131_260_33
2015-10-30 12:59:45 - Standardizing flags of unmapped read: test_mRNA_39_219_5c
2015-10-30 12:59:45 - Standardizing flags of unmapped read: test_mRNA_50_224_2d
2015-10-30 12:59:45 - Standardizing flags of unmapped read: test_mRNA_51_248_14

```





```
INFO 2015-11-11 17:43:33 AddOrReplaceReadGroups Created read group ID=1 PL=illumina LB=1 SM=LU
```

```
[Wed Nov 11 17:43:33 CET 2015] picard.sam.AddOrReplaceReadGroups done. Elapsed time: 0.00 minutes.  
Runtime.totalMemory()=376963072
```

In conclusion, the `unmapped_fixup.bam` or `merged_fixup.bam` files containing the corrected unmapped reads can be used as input for further BAM processing and analysis software, e.g., Picard, GATK, or quality assessment software like RNA-SeqC (<https://www.broadinstitute.org/cancer/cga/rna-seqc>). This can be done without the need for reduced strictness requirements that could mask other problems in the data file, or discarding non-conforming reads from the file, both of which would lead to ignoring potentially useful data. The corrected files can also be deposited in a sequencing archive like NCBI Gene Expression Omnibus (GEO) or the European Nucleotide Archive (ENA), without the need for others to deal with the problems described in this paper.
